# Supplementary material for: Development and Validation of a UHPLC-ESI-MS/MS Method for Quantification of Oleandrin and Other Cardiac Glycosides and Evaluation of Their Levels in Herbs and Spices from the Belgian Market
Source: PubMed Central journal article supplement (PMC7232191; doi:10.3390/toxins12040243), 2020-04-09
Supplement: toxins-12-00243-s001.pdf [file toxins-12-00243-s001.pdf]

## Supplementary Materials: Development and Validation of a UHPLC-ESI-MS/MS Method for Quantification of Oleandrin and Other Cardiac Glycosides and Evaluation of Their Levels in Herbs and Spices from the Belgian Market

Svetlana V. Malysheva \*, Patrick P. J. Mulder and Julien Masquelier

**Table S1.** Comparison of performance characteristics of different LC-MS/MS methods for analysis of cardiac glycosides.

| Cardiac Glycoside(s) | Matrix            | Method      | Limit of Quantification  | Recovery (%) <sup>3</sup> | Repeatability (%) | Reproducibility (%) | Reference <sup>5</sup> |
|----------------------|-------------------|-------------|--------------------------|---------------------------|-------------------|---------------------|------------------------|
| Oleandrin            | culinary herbs    | UHPLC-MS/MS | 1.5 ng/g                 | 83                        | 6                 | 8                   | current study          |
| Digoxin              |                   |             | 7.5 ng/g                 | 115                       | 9                 | 9                   |                        |
| Digitoxin            |                   |             | 15 ng/g                  | 92                        | 10                | 14                  |                        |
| Convallatoxin        |                   |             | 7.5 ng/g                 | 55                        | 9                 | 14                  |                        |
| Oleandrin            | human urine       | UHPLC-MS/MS | 0.025 ng/mL              | 84                        | 3                 | 13                  | current study          |
| Digoxin              |                   |             | 0.5 ng/mL                | 92                        | 3                 | 8                   |                        |
| Digitoxin            |                   |             | 0.25 ng/mL               | 89                        | 5                 | 12                  |                        |
| Convallatoxin        |                   |             | 1 ng/mL                  | 94                        | 3                 | 10                  |                        |
| Ouabain              |                   |             | 1 ng/mL                  | 90                        | 5                 | 13                  |                        |
| Digoxin              | human serum       | HPLC-MS/MS  | 0.12 ng/mL               | 96                        | 6                 | 9                   | [1]                    |
| Digitoxin            |                   |             | 0.4 ng/mL                | 91                        | 11                | 14                  |                        |
| Digoxin              | human whole blood | HPLC-MS/MS  | 0.15 ng/mL <sup>1</sup>  | 106                       | 7                 |                     | [2]                    |
| Digitoxin            |                   |             | 0.3 ng/mL <sup>1</sup>   | 113                       | 10                | /                   |                        |
| Digoxin              | human urine       |             | 0.15 ng/mL <sup>1</sup>  | 94                        | 5                 |                     |                        |
| Digitoxin            |                   |             | 0.3 ng/mL <sup>1</sup>   | 89                        | 9                 |                     |                        |
| Oleandrin            | bovine serum      | UHPLC-MS/MS | 0.36 ng/mL               | 63                        |                   |                     | [3]                    |
|                      | bovine blood      |             |                          | 78                        | /                 | /                   |                        |
|                      | bovine heart      |             |                          | 80                        | /                 | /                   |                        |
|                      | bovine liver      |             |                          | 80                        |                   |                     |                        |
| Oleandrin            | human plasma      | HPLC-MS/MS  | 3 ng/mL <sup>1</sup>     | / <sup>4</sup>            | /                 | /                   | [4]                    |
| Oleandrin            | human whole blood | HPLC-MS/MS  | 0.023 ng/mL <sup>2</sup> | >92                       | <15               | <15                 | [5]                    |

| Cardiac Glycoside(s) | Matrix            | Method      | Limit of Quantification | Recovery (%) <sup>3</sup> | Repeatability (%) | Reproducibility (%) | Reference <sup>5</sup> |
|----------------------|-------------------|-------------|-------------------------|---------------------------|-------------------|---------------------|------------------------|
| Oleandrin            | herbal cosmetics  | UHPLC-MS/MS | 5 ng/g                  | 98                        | 5                 | 5                   | [6]                    |
| Digoxin              | culture medium    | HPLC-MS/MS  | 0.5 ng/mL               | 99                        | 5                 | 5                   | [7]                    |
| Ouabain              |                   |             |                         | 101                       | 3                 | 4                   |                        |
| Digoxin              | cell lysate       | HPLC-MS/MS  | 0.5 ng/mL               | 101                       | 8                 | 7                   | [7]                    |
| Ouabain              |                   |             |                         | 105                       | 4                 | 7                   |                        |
| Digoxin              | human serum       | HPLC-MS/MS  | 0.1 ng/mL               | 101                       | 6                 | 8                   | [8]                    |
| Oleandrin            | human blood       | LC-MS/MS    | 3 ng/mL <sup>1</sup>    | 98                        | <11               | <11                 | [9]                    |
|                      | human liver       |             | 6 ng/g <sup>1</sup>     | 112                       |                   |                     |                        |
| Digoxin              | human whole blood | UHPLC-MS/MS | 0.28 ng/mL              | 104                       | 6                 | 6                   | [10]                   |
| Convallatoxin        | human whole blood | UHPLC-MS/MS | 4.2 ng/mL <sup>1</sup>  | 111                       | 13                | 13                  | [11]                   |
| Digitoxin            |                   |             | 0.3 ng/mL <sup>1</sup>  | 102                       | 14                | 14                  |                        |
| Digoxin              |                   |             | 0.6 ng/mL <sup>1</sup>  | 98                        | 7                 | 9                   |                        |
| Oleandrin            |                   |             | 0.3 ng/mL <sup>1</sup>  | 96                        | 11                | 15                  |                        |

<sup>1</sup> estimated from the reported limits of detection using a factor of 3; <sup>2</sup> estimated from the lowest reported value with regards to S/N of 10; <sup>3</sup> a mean value across different validated levels, where applicable; <sup>4</sup> not reported or not evaluated; <sup>5</sup> a list of references is provided at the end of Supplementary Materials.

**Table S2.** Overview of culinary herbs and spices collected in Belgian food stores.

| Sample Code | Product Name           | Farming     | Country of Production | Ingredients                                                                                                                                                        |
|-------------|------------------------|-------------|-----------------------|--------------------------------------------------------------------------------------------------------------------------------------------------------------------|
| Sample 1    | Garam masala spice mix | non-organic | Germany               | coriander (30%), black pepper (11%), cumin, garlic (10%), chili pepper (5.5%), cinnamon (4%), clove (3.5%), ginger, bay leaf (3%)                                  |
| Sample 2    | Italian herb mix       | organic     | n.s. <sup>1</sup>     | mild chili, oregano, thyme, bay leaf, sage, ground coriander seeds, basil, black pepper                                                                            |
| Sample 3    | Mix for pasta          | organic     | n.s.                  | wild marjoram, thyme, basil, rosemary, garlic, onion, savory, bay leaf                                                                                             |
| Sample 4    | Herb mix for fish      | organic     | n.s.                  | fennel, thyme, parsley, bay leaf                                                                                                                                   |
| Sample 5    | Bay leaves             | organic     | Turkey                | bay leaves                                                                                                                                                         |
| Sample 6    | Garam masala spice mix | non-organic | France                | coriander seeds (49%), black pepper, Jamaican pepper, cumin (6%), cardamom (6%), turmeric, nutmeg, ginger, clove, bay leaf, cinnamon, chili powder, cayenne pepper |

| Sample Code | Product Name                | Farming     | Country of Production | Ingredients                                                                                                                                                            |
|-------------|-----------------------------|-------------|-----------------------|------------------------------------------------------------------------------------------------------------------------------------------------------------------------|
| Sample 7    | Mix for beef stew           | non-organic | France                | dried onion (36%), bell pepper (6%), coriander seed, mustard seed (4%), Jamaican pepper, ginger, white pepper, nutmeg, bay leaf, thyme                                 |
| Sample 8    | Taste refiner               | non-organic | n.s.                  | onion, garlic, turmeric, celery seed, clove, bay leaf                                                                                                                  |
| Sample 9    | Bouquet garni               | non-organic | n.s.                  | bay leaf, thyme                                                                                                                                                        |
| Sample 10   | Bay leaves                  | non-organic | n.s.                  | bay leaves                                                                                                                                                             |
| Sample 11   | Mix for mussels             | non-organic | n.s.                  | vegetables, chives, parsley, tarragon, dill, bay leaf, thyme, pepper, mustard, fennel, turmeric                                                                        |
| Sample 12   | Bay leaves                  | non-organic | n.s.                  | bay leaves                                                                                                                                                             |
| Sample 13   | Bay leaves                  | non-organic | The Netherlands       | bay leaves                                                                                                                                                             |
| Sample 14   | Garam masala spice mix      | non-organic | n.s.                  | coriander seeds, cumin seeds (22%), bell pepper, black pepper, cinnamon, coriander leaves, cardamom (4%), bay leaves, cloves, cayenne pepper                           |
| Sample 15   | Italian herb mix            | non-organic | n.s.                  | garlic, onion, bell pepper, oregano, basil, bay leaf, pepper, nutmeg                                                                                                   |
| Sample 16   | Bay leaves                  | organic     | n.s.                  | bay leaves                                                                                                                                                             |
| Sample 17   | Herb mix for fish           | organic     | n.s.                  | onion, dill, black pepper, tarragon, bay leaf, fennel seeds, thyme                                                                                                     |
| Sample 18   | Bay leaves                  | organic     | Turkey                | bay leaves                                                                                                                                                             |
| Sample 19   | Ras el hanout spice mix     | organic     | n.s.                  | turmeric, cinnamon, fennel, clove, nutmeg, black pepper, ginger, bay leaf, cayenne pepper                                                                              |
| Sample 20   | Chimichurri dry mix         | organic     | n.s.                  | bell pepper, onion, tomato, basil, oregano, thyme, black pepper, seaweed, garlic, cumin seed, bay leaf, cayenne pepper                                                 |
| Sample 21   | Vadouvan spice mix          | organic     | n.s.                  | onion, turmeric, cardamom, garlic, fennel seed, cumin seed, seaweed, mustard seed, carrot, tarragon, clove, fenugreek seed, cinnamon, bay leaf, cayenne pepper, lovage |
| Sample 22   | Italian herb mix            | organic     | n.s.                  | basil, marjoram, rosemary, onion, thyme, seaweed, savory, garlic, bay leaf, bell pepper                                                                                |
| Sample 23   | Roasted vegetables herb mix | non-organic | n.s.                  | onion, garlic, rosemary, tomato, parsley, thyme, black pepper, bay leaf                                                                                                |
| Sample 24   | Spice mix                   | non-organic | Sweden                | black pepper, juniper (16%), roasted garlic, mushroom (5.5%), parsley, rosemary, thyme, carrot, pink pepper, coriander, bay leaf                                       |
| Sample 25   | Mix for beef stew           | non-organic | n.s.                  | black pepper, mustard seed, nutmeg, onion, garlic, thyme, bay leaf                                                                                                     |

| Sample Code | Product Name                         | Farming     | Country of Production | Ingredients                                                                                                                                                         |
|-------------|--------------------------------------|-------------|-----------------------|---------------------------------------------------------------------------------------------------------------------------------------------------------------------|
| Sample 26   | Curry mix                            | non-organic | n.s.                  | coriander seed, turmeric, fenugreek, mustard seed, cumin seed, cinnamon, bay leaf, clove, garlic                                                                    |
| Sample 27   | Mix for chicken tikka masala         | non-organic | n.s.                  | bell pepper, lemongrass, turmeric, cayenne pepper, coriander seeds, nutmeg, cumin seeds, fennel seeds, white pepper, garlic, onion, chives, bay leaves, thyme       |
| Sample 28   | Mix for beef stew                    | non-organic | n.s.                  | black pepper (15%), mustard seeds, nutmeg (5%), onion, thyme (5%), bay leaf (4%), garlic (5%)                                                                       |
| Sample 29   | Tajine spice blend                   | non-organic | n.s.                  | ginger, cumin (4%), cinnamon (3%), paprika, allspice, bay leaf, cardamom (1%), black pepper, carrot, onion, leek, parsnip, garlic, oregano, basil, cabbage, paprika |
| Sample 30   | Mix for spaghetti                    | non-organic | n.s.                  | vegetables (39.9%), garlic, oregano, thyme, bay leaf, rosemary, pepper, parsley root                                                                                |
| Sample 31   | Mix for beef stew                    | non-organic | n.s.                  | onion (15%), tomato (11%), pepper, clove, parsley root, bay leaf                                                                                                    |
| Sample 32   | Bay leaves (fresh)                   | non-organic | Morocco               | bay leaves                                                                                                                                                          |
| Sample 33   | Bouquet garni                        | non-organic | n.s.                  | thyme, bay leaf                                                                                                                                                     |
| Sample 34   | Bay leaves                           | non-organic | n.s.                  | bay leaves                                                                                                                                                          |
| Sample 35   | Mix for couscous                     | non-organic | n.s.                  | red pepper, cumin, coriander seeds, pepper, dried onion, white pepper, bay leaf, clove                                                                              |
| Sample 36   | Bouquet garni for fish               | non-organic | n.s.                  | thyme, coriander, fennel, basil, parsley, bay leaf                                                                                                                  |
| Sample 37   | Bouquet garni for meat               | non-organic | n.s.                  | thyme, coriander, marjoram, parsley, bay leaf                                                                                                                       |
| Sample 38   | Bay leaves                           | non-organic | n.s.                  | bay leaves                                                                                                                                                          |
| Sample 39   | Bay leaves                           | non-organic | Turkey                | bay leaves                                                                                                                                                          |
| Sample 40   | Bay leaves (crushed)                 | non-organic | n.s.                  | bay leaves                                                                                                                                                          |
| Sample 41   | Mix for paella                       | non-organic | n.s.                  | dried garlic, red pepper (18%), mild pepper (17%), dried onion (14%), turmeric, bay leaf, savory, black pepper, clove                                               |
| Sample 42   | Bouquet garni for fish and shellfish | non-organic | EU                    | dried carrot (31.6%), savory, dried onion (10.5%), dried garlic, coriander seeds, black pepper, Jamaican pepper, basil, bay leaf (5.3%), fennel                     |
| Sample 43   | Bouquet garni for meat and stew      | non-organic | EU                    | savory, bay leaf (27.7%), rosemary, basil (8.2%), black pepper, thyme (4%)                                                                                          |

| Sample Code | Product Name            | Farming     | Country of Production | Ingredients                                                                                                                                                                               |
|-------------|-------------------------|-------------|-----------------------|-------------------------------------------------------------------------------------------------------------------------------------------------------------------------------------------|
| Sample 44   | Mix for chicken         | non-organic | EU                    | bell pepper (13%), turmeric (4%), coriander seeds (3%), onion powder, garlic powder, parsley, black pepper, thyme, ginger, bay leaf, nutmeg, cayenne pepper, cumin                        |
| Sample 45   | Bay leaves (crushed)    | non-organic | n.s.                  | bay leaves                                                                                                                                                                                |
| Sample 46   | Bay leaves (crushed)    | non-organic | n.s.                  | bay leaves                                                                                                                                                                                |
| Sample 47   | Mix for fish            | non-organic | n.s.                  | fennel, garlic, coriander, cumin, bay leaf, pepper, mustard, clove, Mexico pepper, fenugreek                                                                                              |
| Sample 48   | Mix for chicken         | non-organic | n.s.                  | bell pepper, coriander, turmeric, mustard seeds, cumin, chilies, fennel seeds, fenugreek, cardamom, black pepper, garlic, cloves, garlic, nutmeg, onion, chervil, chives, thyme, bay leaf |
| Sample 49   | Bay leaves              | organic     | n.s.                  | bay leaves                                                                                                                                                                                |
| Sample 50   | Mix for couscous        | organic     | n.s.                  | bell pepper, coriander (22%), cumin (20%), red pepper, onion (9%), chili, bay leaf, black pepper, clove                                                                                   |
| Sample 51   | Mix for paella          | organic     | n.s.                  | turmeric, dried onion, red bell pepper (14%), bell pepper, dried garlic (10%), fennel, black pepper, chili, Jamaican pepper, parsley, bay leaf (3%)                                       |
| Sample 52   | Bouquet garni           | non-organic | n.s.                  | parsley, thyme, bay leaf                                                                                                                                                                  |
| Sample 53   | Bouquet garni           | organic     | n.s.                  | thyme, bay leaf, rosemary                                                                                                                                                                 |
| Sample 54   | Mix for minced meat     | non-organic | n.s.                  | garlic, onion, paprika, oregano, basil, bay leaf, pepper, nutmeg                                                                                                                          |
| Sample 55   | Mediterranean spices    | non-organic | n.s.                  | rosemary (20%), thyme (5,9%), tomato (12%), onion, garlic, parsley, black pepper, bay leaf                                                                                                |
| Sample 56   | Mix for mussels         | non-organic | n.s.                  | onion, carrot, leek, tomato, parsley, thyme, celery leaves, bay leaves                                                                                                                    |
| Sample 57   | Mix for pizza           | non-organic | n.s.                  | oregano, cayenne pepper, red pepper, bay leaf, paprika, garlic, basil, thyme                                                                                                              |
| Sample 58   | Mix for fish            | non-organic | n.s.                  | dill, fennel, bay leaf, parsley                                                                                                                                                           |
| Sample 59   | Ras el hanout spice mix | non-organic | n.s.                  | turmeric, caraway, coriander, cumin, chili pepper, ginger, fenugreek, cinnamon, fennel, bay leaf, cloves, pepper                                                                          |
| Sample 60   | Mix for tandoori        | non-organic | n.s.                  | bell pepper, garlic, pepper, coriander, cumin, caraway seeds, rosemary, thyme, cloves, bay leaves, cinnamon, black pepper                                                                 |
| Sample 61   | Herbes de Provence      | non-organic | n.s.                  | bay leaf, rosemary, savory, oregano, thyme                                                                                                                                                |

| Sample Code | Product Name    | Farming     | Country of Production | Ingredients                                                                                     |
|-------------|-----------------|-------------|-----------------------|-------------------------------------------------------------------------------------------------|
| Sample 62   | Mix for mussels | non-organic | n.s.                  | chives, parsley, tarragon, dill, bay leaf, thyme, pepper, mustard, fennel, turmeric, vegetables |
| Sample 63   | Mix for grill   | non-organic | n.s.                  | marjoram, basil, sage, onion, bay leaf, rosemary                                                |
| Sample 64   | Mix for pizza   | non-organic | n.s.                  | oregano, chili, pepper, bay leaf, powdered paprika, garlic, basil, thyme                        |
| Sample 65   | Bouquet garni   | non-organic | n.s.                  | thyme, bay leaf, parsley                                                                        |

<sup>1</sup>n.s.: not specified.

## References

- Bylda, C.; Thiele, R.; Kobold, U.; Volmer, D.A. Simultaneous quantification of digoxin, digitoxin, and their metabolites in serum using high performance liquid chromatography-tandem mass spectrometry. *Drug Test. Anal.* **2015**, *7*, 937–946. DOI: 10.1002/dta.1781.
- Guan, F.; Ishii, A.; Seno, H.; Watanabe-Suzuki, K.; Kumazawa, T.; Suzuki, O. Identification and quantification of cardiac glycosides in blood and urine samples by HPLC/MS/MS. *Anal. Chem.* **1999**, *71*, 4034–4043. DOI: 10.1021/ac990268c.
- Gosetti, F.; Nebbia, C.; Ceci, L.; Carelli, G.; Marengo, E. UHPLC-MS/MS determination of oleandrin in blood and tissues of dairy cattle poisoned by oleander (*Nerium oleander*). *Anal. Methods* **2019**, *11*, 5562–5567. DOI: 10.1039/C9AY01800J.
- Wang, X.; Plomley, J.B.; Newman, R.A.; Cisneros, A. LC/MS/MS analyses of an oleander extract for cancer treatment. *Anal. Chem.* **2000**, *72*, 3547–3552. DOI: 10.1021/ac991425a.
- Wasfi, I.A.; Zorod, O.; Al katheeri, N.A.; Al Awadhi, A.M. A fatal case of oleandrin poisoning. *Forensic Sci. Int.* **2008**, *179*, e31–e36. DOI: 10.1016/j.forsciint.2008.05.002.
- Xun, Z.; Liu, D.; Huang, R.; He, S.; Hu, D.; Guo, X.; Xian, Y. Simultaneous determination of eight alkaloids and oleandrin in herbal cosmetics by dispersive solid-phase extraction coupled with ultra high performance liquid chromatography and tandem mass spectrometry. *J. Sep. Sci.* **2017**, *40*, 1966–1973. DOI: 10.1002/jssc.201601427.
- Yamaguchi, H.; Miyamori, K.; Sato, T.; Ogura, J.; Kobayashi, M.; Yamada, T.; Mano, N.; Iseki, K. Quantification of intracellular and extracellular digoxin and ouabain by liquid chromatography/electrospray ionization tandem mass spectrometry. *J. Chromatogr. B.* **2014**, *972*, 73–80. DOI: 10.1016/j.jchromb.2014.09.043.
- Li, S.; Liu, G.; Jia, J.; Miao, Y.; Gu, S.; Miao, P.; Shi, X.; Wang, Y.; Yu, C. Therapeutic monitoring of serum digoxin for patients with heart failure using a rapid LC-MS/MS method. *Clin. Biochem.* **2010**, *43*, 307–313. DOI:10.1016/j.clinbiochem.2009.09.025.
- Zhai, J.X.; Yan, H.; Shen, M.; Shen, B.H.; Liu, W. Determination of oleandrin in blood and liver samples by LC-MS/MS. *Fa Yi Xue Za Zhi* **2018**, *34*, 585–589. DOI: 10.12116/j.issn.1004-5619.2018.06.002.
- Melo, P.; Machado, R.; Teixeira, H.M. Analysis of digoxin and metildigoxin in whole blood using solid-phase extraction and liquid chromatography tandem mass spectrometry. *Int. J. Anal. Chem.* **2012**, *2012*, 7. DOI:10.1155/2012/975824.
- Carrier, J.; Guitton, J.; Romeuf, L.; Bévalot, F.; Boyer, B.; Fanton, L.; Gaillard, Y. Screening approach by ultra-high performance liquid chromatography-tandem mass spectrometry for the blood quantification of thirty-four toxic principles of plant origin. Application to forensic toxicology. *J. Chromatogr. B.* **2015**, *975*, 65–76. DOI: 10.1016/j.chromb.2014.10.028.
